# Supplementary material
Source: ML conference proceedings conference paper supplement (https://proceedings.neurips.cc/paper_files/paper/2013/hash/7380ad8a673226ae47fce7bff88e9c33-Abstract.html)
Supplement: Supplementary file [file 7380ad8a673226ae47fce7bff88e9c33-Supplemental.zip]

---

# Efficient Supervised Sparse Analysis and Synthesis Operators

## Supplementary Materials

---

**Pablo Sprechmann**  
Duke University  
pablo.sprechmann@duke.edu

**Roe Litman**  
Tel Aviv University  
roeelitman@post.tau.ac.il

**Tal Ben Yakar**  
Tel Aviv University  
talby10@gmail.com

**Alex Bronstein**  
Tel Aviv University  
bron@eng.tau.ac.il

**Guillermo Sapiro**  
Duke University  
guillermo.sapiro@duke.edu

**input** : Sub-gradient  $\delta \mathbf{y}$  of  $\ell$  with respect to network output; intermediate layer outputs  $\{\mathbf{z}^k, \mathbf{b}^k\}$   
**output**: Sub-gradients of  $\ell$  with respect to the parameters,  $\delta \mathbf{A}$ ,  $\delta \mathbf{H}$ ,  $\delta \mathbf{G}$ ,  $\delta \mathbf{F}$ ,  $\delta \mathbf{U}$ ,  $\delta \mathbf{V}$ , and  $\delta \mathbf{t}$   
Initialize  $\delta \mathbf{U}^{K+1} = \delta \mathbf{y} \mathbf{x}^T$ ,  $\delta \mathbf{V}^{K+1} = \delta \mathbf{y} (2\mathbf{z}^{K+1} - \mathbf{b}^{K+1})^T$ ,  $\delta \mathbf{A} = \mathbf{0}$ ,  
 $\delta \mathbf{F}^{K+1} = \delta \mathbf{G}^{K+1} = \delta \mathbf{H}^{K+1} = \mathbf{0}$ ,  $\delta \mathbf{t}^{K+1} = \mathbf{0}$ ,  $\delta \mathbf{b}^{K+1} = -\mathbf{V}^T \delta \mathbf{y}$ ,  $\delta \mathbf{b}^{K+2} = \mathbf{0}$ , and  
 $\delta \mathbf{z}^{K+1} = 2\mathbf{V}^T \delta \mathbf{y}$ .  
**for**  $k = K, K-1, \dots, 1$  **do**

$$\begin{aligned}
 \delta \mathbf{s} &= \delta \mathbf{z}^{k+1} + \mathbf{H}^T \delta \mathbf{b}^{k+1} \\
 \delta \mathbf{F}^k &= \delta \mathbf{F}^{k+1} + \delta \mathbf{b}^{k+1} (\mathbf{b}^k)^T \\
 \delta \mathbf{G}^k &= \delta \mathbf{G}^{k+1} + \delta \mathbf{b}^{k+1} (\mathbf{b}^{k-1})^T \\
 \delta \mathbf{H}^k &= \delta \mathbf{H}^{k+1} + \delta \mathbf{b}^{k+1} (\mathbf{z}^{k+1} - \mathbf{z}^k)^T \\
 \delta \mathbf{t}^k &= \delta \mathbf{t}^{k+1} + \delta \mathbf{s} \odot \frac{\partial}{\partial \mathbf{t}} \sigma_{\mathbf{t}}(\mathbf{b}^k) \\
 \delta \mathbf{z}^k &= -\mathbf{H}^T \delta \mathbf{b}^{k+1} \\
 \delta \mathbf{b}^k &= \mathbf{G}^T \delta \mathbf{b}^{k+1} + \mathbf{F}^T \delta \mathbf{b}^{k+2} + \delta \mathbf{s} \odot \frac{\partial}{\partial \mathbf{b}^k} \sigma_{\mathbf{t}}(\mathbf{b}^k)
 \end{aligned}$$

**end**

$\delta \mathbf{A} = \delta \mathbf{b}^1 \mathbf{x}^T$

Output  $\delta \mathbf{A}$ ,  $\delta \mathbf{F}^1$ ,  $\delta \mathbf{G}^1$ ,  $\delta \mathbf{H}^1$ ,  $\delta \mathbf{U}^1$ ,  $\delta \mathbf{V}^1$ , and  $\delta \mathbf{t}^1$ .

**Algorithm 2:** Backpropagation process for the computation of the sub-gradients of  $\ell(\mathbf{y})$ .  $\delta*$  denotes the gradient of  $\ell$  with respect to  $*$  as customary in neural network literature.  $\odot$  denotes element-wise product.

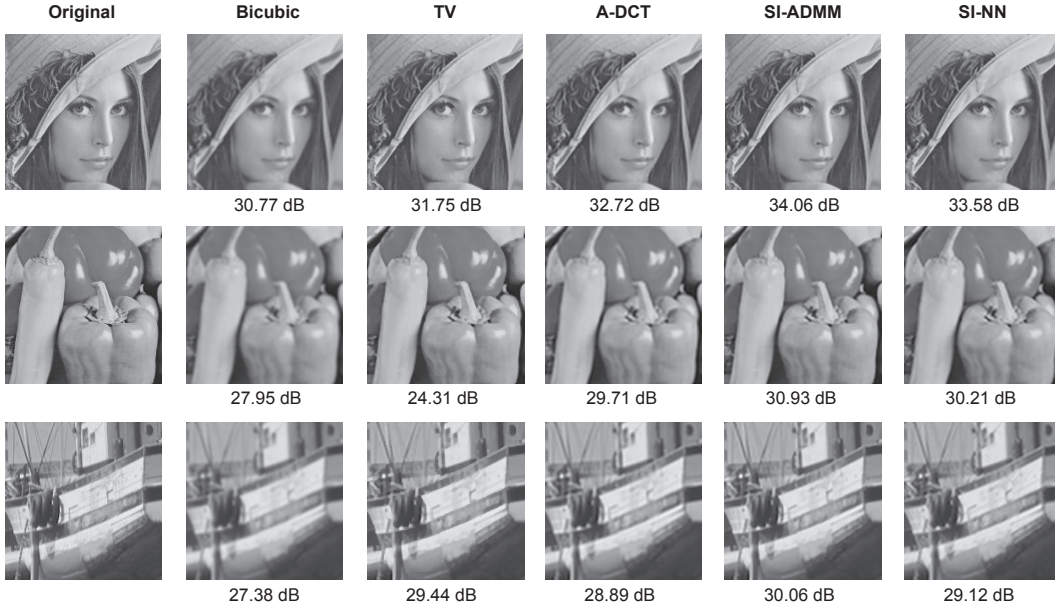

Figure 3: Outputs of different image super-resolution methods (left-to-right): original image, bicubic interpolation, shift-invariant analysis models with TV and DCT priors, supervised shift-invariant analysis model, and its fast neural network approximation. PSNR is reported in dB below each image.

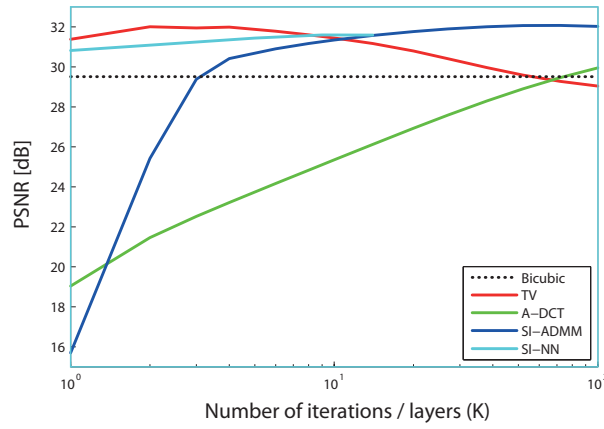

Figure 4: Performance of different analysis super-resolution models as the function of number of ADMM iterations, compared to the performance of the convolutional neural network approximation as the function of number of layers. Compared are shift-invariant analysis models with TV and DCT priors (TV and A-DCT), supervised shift-invariant analysis model (SI-ADMM), and its fast neural network approximation (SI-NN). Bicubic interpolation (Bicubic) is given as a reference. Note the typical non-monotone behavior of the total variation model.
